# Supplementary material for: Comparison of Quality of Life after Robotic, Video-Assisted, and Open Surgery for Lung Cancer
Source: MDPI journal article supplement (doi:10.3390/jcm12196230), 2023-09-27
Supplement: s1 [file s1]

**Table S1:** Full QOL Results (Pre and Post RATS).

| Scale                            | Score       | Before RATS     | After RATS      | p-value |
|----------------------------------|-------------|-----------------|-----------------|---------|
| QLQ-LC30                         |             |                 |                 |         |
| GLOBAL HEALTH STATUS / QOL       |             |                 |                 |         |
| Global Health Status / QOL (QL2) | Raw score   | 5.20 +/- 1.27   | 5.48 +/- 1.02   | 0.113   |
|                                  | Final Score | 70.04 +/- 21.19 | 74.65 +/- 17.02 |         |
| FUNCTIONAL SCALES                |             |                 |                 |         |
| Physical Functioning (PF2)       | Raw score   | 1.42 +/- 0.59   | 1.38 +/- 0.51   | 0.616   |
|                                  | Final Score | 86.10 +/- 19.80 | 87.38 +/- 17.04 |         |
| Role functioning (RF2)           | Raw score   | 1.41 +/- 0.67   | 1.37 +/- 0.61   | 0.664   |
|                                  | Final Score | 86.17 +/- 22.34 | 87.59 +/- 20.40 |         |
| Emotional Functioning (EF)       | Raw score   | 1.46 +/- 0.56   | 1.19 +/- 0.50   | <0.001  |
|                                  | Final Score | 84.75 +/- 18.74 | 93.79 +/- 16.71 |         |
| Cognitive Functioning (CF)       | Raw score   | 1.24 +/- 0.58   | 1.19 +/- 0.52   | 0.359   |
|                                  | Final Score | 91.84 +/- 19.31 | 93.62 +/- 17.22 |         |
| Social Functioning (SF)          | Raw score   | 1.35 +/- 0.63   | 1.29 +/- 0.58   | 0.459   |
|                                  | Final Score | 88.30 +/- 21.11 | 90.43 +/- 19.27 |         |
| SYMPTOM SCALES / ITEMS           |             |                 |                 |         |
| Fatigue (FA)                     | Raw score   | 1.50 +/- 0.67   | 1.35 +/- 0.49   | 0.110   |
|                                  | Final Score | 16.55 +/- 22.21 | 11.82 +/- 16.45 |         |
| Nausea and Vomiting (NV)         | Raw score   | 1.05 +/- 0.21   | 1.10 +/- 0.29   | 0.323   |
|                                  | Final Score | 1.77 +/- 7.15   | 3.19 +/- 9.60   |         |
| Pain (PA)                        | Raw score   | 1.53 +/- 0.72   | 1.45 +/- 0.58   | 0.315   |
|                                  | Final Score | 17.73 +/- 23.93 | 14.89 +/- 19.42 |         |
| Dyspnoea (DY)                    | Raw score   | 1.40 +/- 0.71   | 1.74 +/- 0.82   | 0.017   |
|                                  | Final Score | 13.48 +/- 23.73 | 24.82 +/- 27.34 |         |
| Insomnia (SL)                    | Raw score   | 1.53 +/- 0.78   | 1.36 +/- 0.64   | 0.059   |
|                                  | Final Score | 17.73 +/- 25.87 | 12.06 +/- 21.34 |         |
| Appetite loss (AP)               | Raw score   | 1.21 +/- 0.62   | 1.21 +/- 0.51   | 1.000   |
|                                  | Final Score | 7.09 +/- 20.78  | 7.09 +/- 16.93  |         |
| Constipation (CO)                | Raw score   | 1.21 +/- 0.55   | 1.13 +/- 0.34   | 0.323   |
|                                  | Final Score | 7.09 +/- 18.31  | 4.26 +/- 11.24  |         |
| Diarrhoea (DI)                   | Raw score   | 1.17 +/- 0.56   | 1.19 +/- 0.65   | 0.710   |
|                                  | Final Score | 5.67 +/- 18.80  | 6.38 +/- 21.58  |         |
| Financial difficulties (FI)      | Raw score   | 1.30 +/- 0.72   | 1.28 +/- 0.71   | 0.323   |
|                                  | Final Score | 9.93 +/- 23.99  | 9.22 +/- 23.78  |         |
| QLQ – LC13                       |             |                 |                 |         |
| SYMPTOM SCALES / ITEMS           |             |                 |                 |         |
| Dyspnoea (LCDY)                  | Raw Score   | 1.43 +/- 0.678  | 1.46 +/- 0.60   | 0.649   |
|                                  | Final Score | 14.18 +/- 22.31 | 15.37 +/- 19.87 |         |
| Coughing (LCCO)                  | Raw score   | 1.66 +/- 0.64   | 1.57 +/- 0.62   | 0.351   |
|                                  | Final Score | 21.99 +/- 21.17 | 19.15 +/- 20.55 |         |
| Haemoptysis (LCHA)               | Raw score   | 1.04 +/- 0.29   | 1 +/- 0         | 0.323   |
|                                  | Final Score | 1.42 +/- 9.72   | 0 +/- 0         |         |
| Sore mouth (LCSM)                | Raw score   | 1.04 +/- 0.20   | 1.02 +/- 0.15   | 0.323   |
|                                  | Final Score | 1.42 +/- 6.80   | 0.71 +/- 4.86   |         |
| Dysphagia (LCDS)                 | Raw score   | 1.17 +/- 0.52   | 1.17 +/- 0.48   | 1.000   |
|                                  | Final Score | 5.67 +/- 17.47  | 5.67 +/- 16.03  |         |
| Peripheral neuropathy (LCPN)     | Raw score   | 1.21 +/- 0.59   | 1.19 +/- 0.58   | 0.569   |
|                                  | Final Score | 7.09 +/- 19.58  | 6.38 +/- 19.21  |         |
| Alopecia (LCHR)                  | Raw score   | 1.23 +/- 0.56   | 1.15 +/- 0.47   | 0.044   |
|                                  | Final Score | 7.80 +/- 18.67  | 4.96 +/- 15.51  |         |
| Pain in chest (LCPC)             | Raw score   | 1.21 +/- 0.46   | 1.15 +/- 0.36   | 0.371   |
|                                  | Final Score | 7.09 +/- 15.44  | 4.96 +/- 12.0   |         |
| Pain in arm or shoulder (LCPA)   | Raw score   | 1.30 +/- 0.59   | 1.30 +/- 0.66   | 1.000   |
|                                  | Final Score | 9.93 +/- 19.55  | 9.93 +/- 21.89  |         |
| Pain in other parts (LCPO)       | Raw score   | 1.51 +/- 0.86   | 1.47 +/- 0.78   | 0.323   |
|                                  | Final Score | 17.02 +/- 28.55 | 15.60 +/- 25.87 |         |

**Table S2:** Full QOL Results ( RATS vs VATS vs Thoracotomy)

| Scale                            | Score       | Thoracotomy     | VATS            | RATS            | p-value |
|----------------------------------|-------------|-----------------|-----------------|-----------------|---------|
| QLQ-LC30                         |             |                 |                 |                 |         |
| GLOBAL HEALTH STATUS / QOL       |             |                 |                 |                 |         |
| Global Health Status / QOL (QL2) | Raw score   | 5.00 +/- 1.58   | 4.97 +/- 1.43   | 5.43 +/- 1.06   | 0.176   |
|                                  | Final Score | 66.67 +/- 26.35 | 66.24 +/- 23.76 | 73.76 +/- 17.63 |         |
| FUNCTIONAL SCALES                |             |                 |                 |                 |         |
| Physical Functioning (PF2)       | Raw score   | 1.78 +/- 0.75   | 1.72 +/- 0.68   | 1.42 +/- 0.51   | 0.020   |
|                                  | Final Score | 73.94 +/- 25.11 | 75.95 +/- 22.63 | 86.10 +/- 16.90 |         |
| Role functioning (RF2)           | Raw score   | 1.70 +/- 0.93   | 1.82 +/- 0.94   | 1.45 +/- 0.72   | 0.076   |
|                                  | Final Score | 76.52 +/- 31.14 | 72.78 +/- 31.48 | 85.11 +/- 23.88 |         |
| Emotional Functioning (EF)       | Raw score   | 1.61 +/- 0.68   | 1.66 +/- 0.80   | 1.22 +/- 0.51   | 0.003   |
|                                  | Final Score | 79.76 +/- 22.60 | 77.99 +/- 26.56 | 92.79 +/- 17.02 |         |
| Cognitive Functioning (CF)       | Raw score   | 1.45 +/- 0.52   | 1.58 +/- 0.65   | 1.22 +/- 0.52   | 0.007   |
|                                  | Final Score | 84.92 +/- 17.40 | 80.77 +/- 21.67 | 92.55 +/- 17.31 |         |
| Social Functioning (SF)          | Raw score   | 1.62 +/- 0.96   | 1.73 +/- 0.93   | 1.28 +/- 0.58   | 0.015   |
|                                  | Final Score | 79.37 +/- 32.02 | 75.64 +/- 30.94 | 90.78 +/- 19.29 |         |
| SYMPTOM SCALES / ITEMS           |             |                 |                 |                 |         |
| Fatigue (FA)                     | Raw score   | 2.28 +/- 0.78   | 2.02 +/- 0.90   | 1.46 +/- 0.57   | <0.001  |
|                                  | Final Score | 42.68 +/- 25.97 | 34.04 +/- 30.00 | 15.37 +/- 19.04 |         |
| Nausea and Vomiting (NV)         | Raw score   | 1.20 +/- 0.37   | 1.20 +/- 0.42   | 1.13 +/- 0.32   | 0.540   |
|                                  | Final Score | 6.82 +/- 12.24  | 6.75 +/- 14.00  | 4.26 +/- 10.69  |         |
| Pain (PA)                        | Raw score   | 1.64 +/- 0.54   | 1.72 +/- 0.87   | 1.49 +/- 0.59   | 0.264   |
|                                  | Final Score | 21.21 +/- 17.95 | 23.84 +/- 28.95 | 16.31 +/- 19.81 |         |
| Dyspnoea (DY)                    | Raw score   | 2.27 +/- 0.98   | 2.10 +/- 0.90   | 1.77 +/- 0.81   | 0.046   |
|                                  | Final Score | 42.42 +/- 32.82 | 36.71 +/- 30    | 25.53 +/- 27.11 |         |
| Insomnia (SL)                    | Raw score   | 1.82 +/- 1.10   | 1.75 +/- 0.99   | 1.45 +/- 0.77   | 0.164   |
|                                  | Final Score | 27.27 +/- 36.57 | 24.89 +/- 33.11 | 14.89 +/- 25.83 |         |
| Appetite loss (AP)               | Raw score   | 1.41 +/- 0.80   | 1.70 +/- 1.03   | 1.32 +/- 0.63   | 0.058   |
|                                  | Final Score | 13.64 +/- 26.55 | 23.21 +/- 34.32 | 10.64 +/- 20.97 |         |
| Constipation (CO)                | Raw score   | 1.50 +/- 0.86   | 1.49 +/- 0.78   | 1.21 +/- 0.51   | 0.088   |
|                                  | Final Score | 16.67 +/- 28.64 | 16.46 +/- 26.08 | 7.09 +/- 16.93  |         |
| Diarrhoea (DI)                   | Raw score   | 1.38 +/- 0.80   | 1.18 +/- 0.48   | 1.23 +/- 0.70   | 0.403   |
|                                  | Final Score | 12.70 +/- 26.82 | 5.98 +/- 15.89  | 7.80 +/- 23.27  |         |
| Financial difficulties (FI)      | Raw score   | 1.24 +/- 0.70   | 1.19 +/- 0.54   | 1.26 +/- 0.71   | 0.863   |
|                                  | Final Score | 7.94 +/- 23.34  | 6.49 +/- 17.97  | 8.51 +/- 23.54  |         |
| QLQ-LC13                         |             |                 |                 |                 |         |
| SYMPTOM SCALES / ITEMS           |             |                 |                 |                 |         |
| Dyspnoea (LCDY)                  | Raw score   | 1.72 +/- 0.77   | 1.79 +/- 0.78   | 1.49 +/- 0.59   | 0.086   |
|                                  | Final Score | 23.98 +/- 25.73 | 26.29 +/- 25.97 | 16.31 +/- 19.64 |         |
| Coughing (LCCO)                  | Raw score   | 2.10 +/- 0.83   | 1.85 +/- 0.82   | 1.6 +/- 0.65    | 0.036   |
|                                  | Final Score | 36.51 +/- 27.70 | 28.44 +/- 27.23 | 19.86 +/- 21.6  |         |
| Haemoptysis (LCHA)               | Raw score   | 1 +/- 0         | 1.03 +/- 0.23   | 1 +/- 0         | 0.639   |
|                                  | Final Score | 0 +/- 0         | 0.89 +/- 7.70   | 0 +/- 0         |         |
| Sore mouth (LCSM)                | Raw score   | 1.19 +/- 0.51   | 1.24 +/- 0.59   | 1.02 +/- 0.15   | 0.047   |
|                                  | Final Score | 6.35 +/- 17.06  | 8.11 +/- 19.75  | 0.71 +/- 4.86   |         |
| Dysphagia (LCDS)                 | Raw score   | 1.01 +/- 0.30   | 1.19 +/- 0.48   | 1.19 +/- 0.50   | 0.699   |
|                                  | Final Score | 3.17 +/- 10.03  | 6.22 +/- 16.16  | 6.38 +/- 16.5   |         |
| Peripheral neuropathy (LCPN)     | Raw score   | 1.24 +/- 0.44   | 1.45 +/- 0.81   | 1.19 +/- 0.58   | 0.105   |
|                                  | Final Score | 7.94 +/- 14.55  | 15.11 +/- 27.01 | 6.38 +/- 19.21  |         |
| Alopecia (LCHR)                  | Raw score   | 1.24 +/- 0.70   | 1.11 +/- 0.39   | 1.17 +/- 0.48   | 0.492   |
|                                  | Final Score | 7.94 +/- 23.34  | 3.56 +/- 12.94  | 5.67 +/- 16.03  |         |
| Pain in chest (LCPC)             | Raw score   | 1.52 +/- 0.51   | 1.29 +/- 0.63   | 1.19 +/- 0.40   | 0.073   |
|                                  | Final Score | 17.46 +/- 17.06 | 9.78 +/- 21.06  | 6.38 +/- 13.26  |         |
| Pain in arm or shoulder (LCPA)   | Raw score   | 1.52 +/- 0.75   | 1.47 +/- 0.86   | 1.4 +/- 0.80    | 0.837   |
|                                  | Final Score | 17.46 +/- 24.99 | 15.77 +/- 28.79 | 13.48 +/- 26.61 |         |
| Pain in other parts (LCPO)       | Raw score   | 1.75 +/- 1.02   | 1.93 +/- 1      | 1.62 +/- 0.95   | 0.233   |
|                                  | Final Score | 25.00 +/- 33.98 | 31.02 +/- 33.25 | 20.57 +/- 31.51 |         |
